# Supplementary material
Source: PubMed Central journal article supplement (PMC5220660)
Supplement: CJN.05400516SupplementaryData.pdf [file CJN.05400516SupplementaryData.pdf]

Supplementary Table 1. Individual patient results

| Sample | Mean Cr <sup>a</sup><br>(SD) | Min-Max<br>Cr <sup>a</sup> | Mean<br>eGFR-EPI <sup>b</sup><br>(SD) | Min-Max<br>eGFR-<br>EPI <sup>b</sup> | Bilirubin<br>(mg/dL) | Glucose<br>(mg/dL) | Total<br>protein<br>(g/dL) |
|--------|------------------------------|----------------------------|---------------------------------------|--------------------------------------|----------------------|--------------------|----------------------------|
| 1      | 0.28 (0.08)                  | 0.2-0.4                    | 124(12)                               | 109-147                              | 31.3                 | 94                 | 3.4                        |
| 2      | 0.38 (0.07)                  | 0.3-0.5                    | 112(6)                                | 102-118                              | 0.4                  | 92                 | 5.2                        |
| 3      | 0.44 (0.06)                  | 0.4-0.6                    | 106(5)                                | 99-114                               | 0.6                  | 133                | 5.5                        |
| 4      | 0.45 (0.08)                  | 0.4-0.6                    | 105(6)                                | 98-114                               | 6.4                  | 196                | 5.5                        |
| 5      | 0.51 (0.05)                  | 0.4-0.6                    | 101(3)                                | 97-106                               | 0.5                  | 99                 | 5.7                        |
| 6      | 0.53 (0.04)                  | 0.5-0.6                    | 100(3)                                | 96-105                               | 0.4                  | 103                | 4.7                        |
| 7      | 0.58 (0.05)                  | 0.5-0.6                    | 97(3)                                 | 94-101                               | 0.4                  | 140                | 5.1                        |
| 8      | 0.64 (0.04)                  | 0.6-0.7                    | 94(2)                                 | 90-98                                | 1.5                  | 137                | 4.4                        |
| 9      | 0.82 (0.04)                  | 0.8-0.9                    | 75(4)                                 | 70-81                                | 2.0                  | 106                | 4.2                        |
| 10     | 0.90 (0.19)                  | 0.7-1.2                    | 67(15)                                | 45-89                                | 0.5                  | 441                | 5.1                        |
| 11     | 0.91 (0.06)                  | 0.8-1.0                    | 66(5)                                 | 57-75                                | 0.3                  | 117                | 4.4                        |
| 12     | 0.92 (0.04)                  | 0.8-1.0                    | 66(4)                                 | 59-77                                | 0.4                  | 133                | 5.9                        |
| 13     | 0.97 (0.04)                  | 0.9-1.0                    | 61(3)                                 | 56-65                                | 0.4                  | 86                 | 5.5                        |
| 14     | 0.98 (0.10)                  | 0.9-1.2                    | 61(7)                                 | 47-70                                | 1.0                  | 146                | 5.1                        |
| 15     | 0.99 (0.05)                  | 0.9-1.1                    | 60(4)                                 | 53-69                                | 0.9                  | 175                | 5.7                        |
| 16     | 1.01 (0.04)                  | 0.9-1.1                    | 59(3)                                 | 53-65                                | 0.2                  | 173                | 5.6                        |
| 17     | 1.03 (0.05)                  | 0.9-1.1                    | 57(3)                                 | 53-66                                | 0.2                  | 113                | 4.8                        |
| 18     | 1.04 (0.04)                  | 1.0-1.1                    | 56(3)                                 | 52-62                                | 0.6                  | 115                | 5.1                        |
| 19     | 1.05 (0.05)                  | 0.9-1.1                    | 56(4)                                 | 51-66                                | 0.4                  | 108                | 3.6                        |
| 20     | 1.19 (0.06)                  | 1.1-1.3                    | 48(3)                                 | 43-53                                | 0.4                  | 108                | 5.5                        |
| 21     | 1.21 (0.05)                  | 1.1-1.3                    | 47(2)                                 | 44-52                                | 0.2                  | 140                | 5.4                        |
| 22     | 1.22 (0.06)                  | 1.1-1.3                    | 46(3)                                 | 41-52                                | 0.6                  | 117                | 5.0                        |
| 23     | 1.23 (0.08)                  | 1.1-1.4                    | 46(4)                                 | 40-53                                | 1.8                  | 133                | 7.9                        |
| 24     | 1.24 (0.05)                  | 1.2-1.3                    | 46(2)                                 | 42-49                                | 2.0                  | 169                | 4.8                        |
| 25     | 1.24 (0.05)                  | 1.1-1.3                    | 46(2)                                 | 42-50                                | 0.6                  | 81                 | 6.2                        |
| 26     | 1.26 (0.07)                  | 1.2-1.4                    | 45(3)                                 | 40-48                                | 1.1                  | 167                | 5.3                        |
| 27     | 1.27 (0.07)                  | 1.1-1.4                    | 45(3)                                 | 41-51                                | 1.3                  | 92                 | 5.1                        |
| 28     | 1.37 (0.05)                  | 1.3-1.5                    | 40(2)                                 | 37-43                                | 0.6                  | 119                | 5.3                        |
| 29     | 1.41 (0.06)                  | 1.3-1.5                    | 39(2)                                 | 36-42                                | 0.5                  | 167                | 6.1                        |
| 30     | 1.54 (0.08)                  | 1.4-1.7                    | 35(2)                                 | 30-40                                | 1.3                  | 182                | 4.3                        |
| 31     | 1.60 (0.06)                  | 1.5-1.7                    | 34(2)                                 | 31-37                                | 0.8                  | 126                | 4.5                        |
| 32     | 1.60 (0.05)                  | 1.5-1.7                    | 33(1)                                 | 31-36                                | 0.4                  | 110                | 6.0                        |
| 33     | 1.61 (0.08)                  | 1.5-1.7                    | 33(2)                                 | 31-36                                | 5.8                  | 65                 | 4.8                        |
| 34     | 1.73 (0.05)                  | 1.7-1.8                    | 30(1)                                 | 28-32                                | 0.8                  | 144                | 5.9                        |
| 35     | 1.75 (0.10)                  | 1.7-2.0                    | 30(2)                                 | 25-32                                | 8.8                  | 293                | 4.4                        |
| 36     | 1.78 (0.13)                  | 1.7-2.1                    | 29(2)                                 | 24-32                                | 0.6                  | 270                | 3.6                        |
| 37     | 1.91 (0.10)                  | 1.8-2.1                    | 27(2)                                 | 24-29                                | 0.8                  | 194                | 5.6                        |
| 38     | 2.13 (0.08)                  | 2.0-2.3                    | 24(1)                                 | 22-25                                | 1.2                  | 43                 | 4.7                        |
| 39     | 2.32 (0.06)                  | 2.2-2.4                    | 21(1)                                 | 20-23                                | 0.4                  | 128                | 5.9                        |
| 40     | 2.52 (0.19)                  | 2.3-2.9                    | 19(2)                                 | 16-21                                | 1.3                  | 578                | 3.9                        |
| 41     | 2.54 (0.10)                  | 2.3-2.7                    | 19(1)                                 | 18-21                                | 0.9                  | 162                | 5.0                        |
| 42     | 2.57 (0.09)                  | 2.5-2.8                    | 19(0.8)                               | 17-20                                | 0.6                  | 200                | 4.6                        |
| 43     | 2.66 (0.11)                  | 2.6-2.9                    | 18(1)                                 | 16-19                                | 2.9                  | 88                 | 5.1                        |
| 44     | 3.16 (0.10)                  | 3.0-3.4                    | 15(0.6)                               | 14-16                                | 2.0                  | 157                | 4.8                        |
| 45     | 3.18 (0.07)                  | 3.0-3.3                    | 15(0.4)                               | 14-15                                | 0.3                  | 171                | 5.0                        |
| 46     | 3.25 (0.08)                  | 3.1-3.4                    | 14(0.4)                               | 14-15                                | 0.2                  | 315                | 5.2                        |
| 47     | 3.72 (0.11)                  | 3.5-3.9                    | 12(0.4)                               | 11-13                                | 0.5                  | 166                | 5.6                        |
| 48     | 5.21 (0.10)                  | 5.1-5.4                    | 8(0.2)                                | 8-8                                  | 0.4                  | 40                 | 5.0                        |
| 49     | 5.40 (0.13)                  | 5.2-5.6                    | 8(0.2)                                | 7-8                                  | 0.5                  | 106                | 5.7                        |
| 50     | 5.71 (0.17)                  | 5.4-5.9                    | 7(0.3)                                | 7-8                                  | 0.7                  | 167                | 4.0                        |
| 51     | 6.61 (0.18)                  | 6.4-7.0                    | 6(0.2)                                | 6-6                                  | 1.1                  | 135                | 6.1                        |
| 52     | 7.61 (0.11)                  | 7.5-7.8                    | 5(0.1)                                | 5-5                                  | 0.3                  | 137                | 6.3                        |
| 53     | 7.97 (0.13)                  | 7.8-8.2                    | 5(0.1)                                | 5-5                                  | 0.3                  | 74                 | 5.3                        |

<sup>a</sup>Cr in mg/dl; <sup>b</sup>eGFR-EPI in ml/min/1.73m<sup>2</sup>

Supplemental Table 2. CKD-EPI vs MDRD eGFR and Ranges<sup>a</sup>

| Sample | Mean eGFR-<br>EPI (SD) | Min-Max<br>eGFR-EPI | eGFR- EPI<br>Range | Mean eGFR-<br>MDRD (SD) | Min-Max<br>eGFR- MDRD | eGFR-MDRD<br>Range |
|--------|------------------------|---------------------|--------------------|-------------------------|-----------------------|--------------------|
| 10     | 70 (15)                | 45-89               | 44                 | 66 (14)                 | 43-82                 | 39                 |
| 11     | 67 (5)                 | 57-75               | 18                 | 62 (5)                  | 53-70                 | 16                 |
| 12     | 66 (4)                 | 59-77               | 18                 | 61 (4)                  | 56-71                 | 16                 |
| 13     | 62 (3)                 | 56-65               | 9                  | 58 (3)                  | 53-61                 | 8                  |
| 14     | 62 (7)                 | 47-70               | 23                 | 58 (6)                  | 44-65                 | 21                 |
| 15     | 60 (4)                 | 53-69               | 16                 | 57 (3)                  | 50-64                 | 15                 |
| 16     | 59 (3)                 | 53-65               | 12                 | 55 (3)                  | 50-61                 | 11                 |
| 17     | 57 (3)                 | 53-66               | 13                 | 54 (3)                  | 50-62                 | 12                 |
| 18     | 57 (3)                 | 52-62               | 10                 | 53 (2)                  | 49-58                 | 9                  |
| 19     | 56 (4)                 | 51-66               | 15                 | 53 (3)                  | 49-62                 | 13                 |

<sup>a</sup> 4-variable MDRD eGFR(mL/min/1.73m<sup>2</sup>) assuming 65 year old non- African American woman
